# Supplementary material for: A Brain Mechanism for Hate
Source: Atypon-hosted journal article supplement (doi:10.1176/appi.neuropsych.20220121), 2023-02-14
Supplement: jnp_20220121_correction01.pdf [file jnp_20220121_correction01.pdf]

 


Psychiatry Online
