# Supplementary material for: A Brain Mechanism for Hate
Source: Atypon-hosted journal article supplement (doi:10.1176/appi.neuropsych.20220121), 2023-02-14
Supplement: suppl [file jnp_20220121_correction01.pdf]

## **Correction to Mendez**

In the Opinion piece, “A Brain Mechanism for Hate,” by Mario F. Mendez, M.D., Ph.D. (<https://doi.org/10.1176/appi.neuropsych.20220121>), a sentence at the top of the second column contained an error. The correct sentence is as follows:

This theory proposes that hate involves passion, commitment, and a negation of intimacy, which are derived through stories that involve prototypes of targets with negative characteristics.

The article was originally published online on February 14, 2023, and appeared in the Summer 2023 issue (Vol. 35, No. 3, pp. 262–263). A corrected version of the article with the corrected sentence was posted online on March 27, 2024.
